# Supplementary figures and images for: Use of a Web-Based Shared Decision-Making Program: Impact on Ongoing Treatment Engagement and Antipsychotic Adherence
Source: Atypon-hosted journal article supplement (doi:10.1176/appi.ps.201800130), 2018-10-05

**ONLINE SUPPLEMENT**

**eFigure 1: Participant flow diagram for MyCHOIS-CommonGround users group**

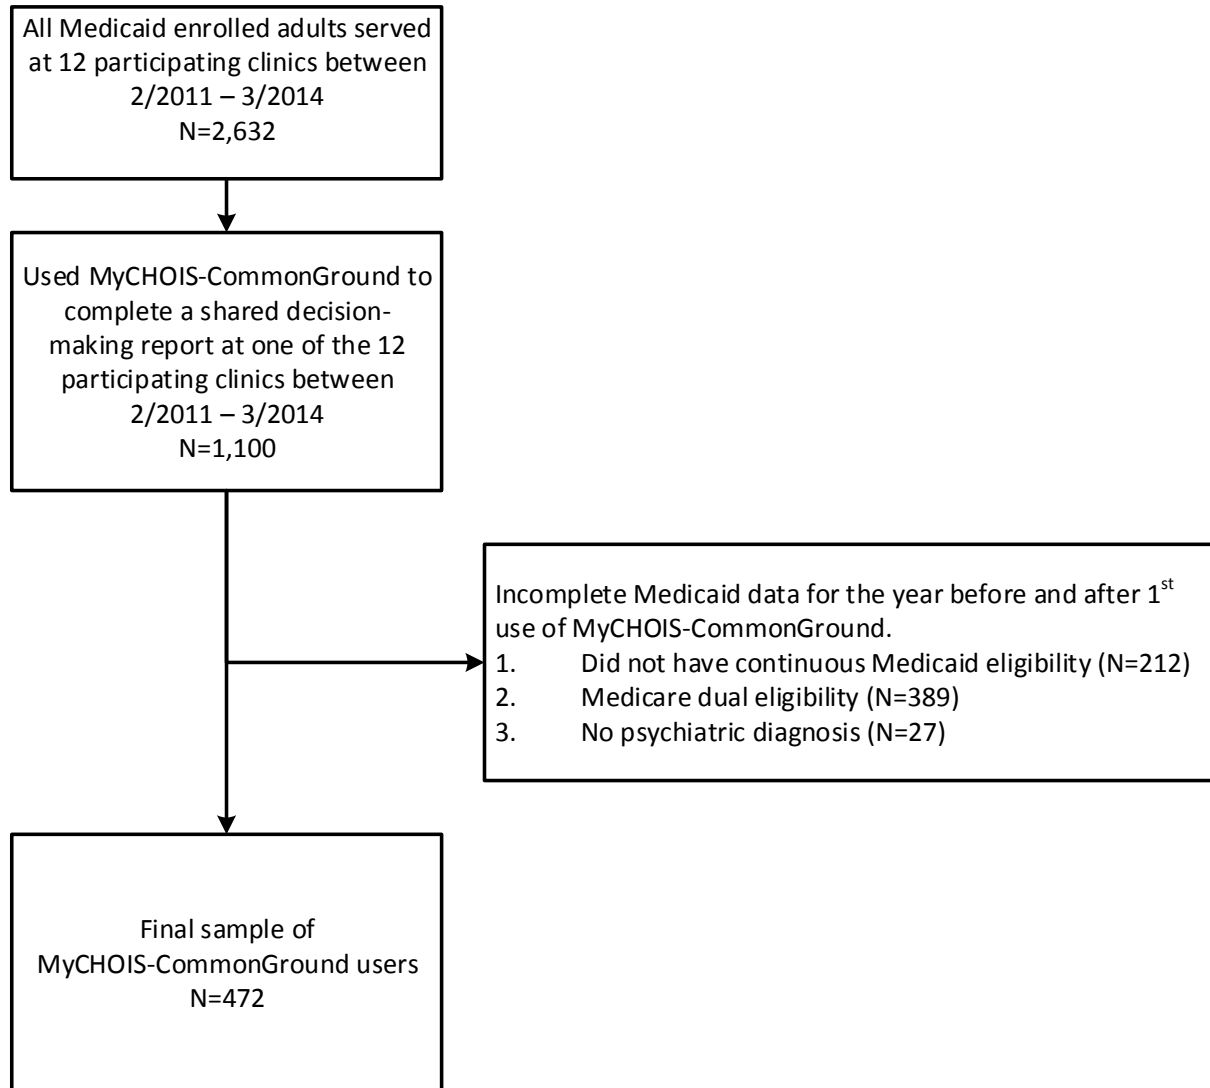

Supplement: appi.ps.201800130.ds001.pdf [file appi.ps.201800130.ds001.pdf]
